# Supplementary material for: Obesity and Insulin Resistance Promote Atherosclerosis through an IFNγ-Regulated Macrophage Protein Network
Source: PubMed Central journal article supplement — Cell Rep. Author manuscript; Available in PMC 2018 Aug 8. (PMC6082182; doi:10.1016/j.celrep.2018.05.010), 2018-06-05
Supplement: NIHMS976401-supplement-1.pdf [file NIHMS976401-supplement-1.pdf]

**Supplemental Information**

**Obesity and Insulin Resistance Promote**

**Atherosclerosis through an IFN $\gamma$ -Regulated**

**Macrophage Protein Network**

**Catherine A. Reardon, Amulya Lingaraju, Kelly Q. Schoenfelt, Guolin Zhou, Chang Cui, Hannah Jacobs-El, Ilona Babenko, Andrew Hoofnagle, Daniel Czyz, Howard Shuman, Tomas Vaisar, and Lev Becker**

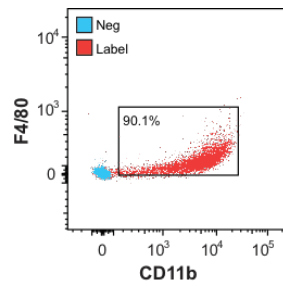

**Fig. S1. Peritoneal macrophage purity (related to all figures).** Wild-type or *Ifngr1*<sup>-/-</sup> C57BL6 mice or *Ldlr*<sup>-/-</sup> mice fed the various diets were injected with thioglycolate in the peritoneal cavity, and elicited peritoneal macrophages were isolated five days after injection. Peritoneal macrophage purity was confirmed by flow cytometry using antibodies raised against murine F4/80 and CD11b. A representative image is shown.

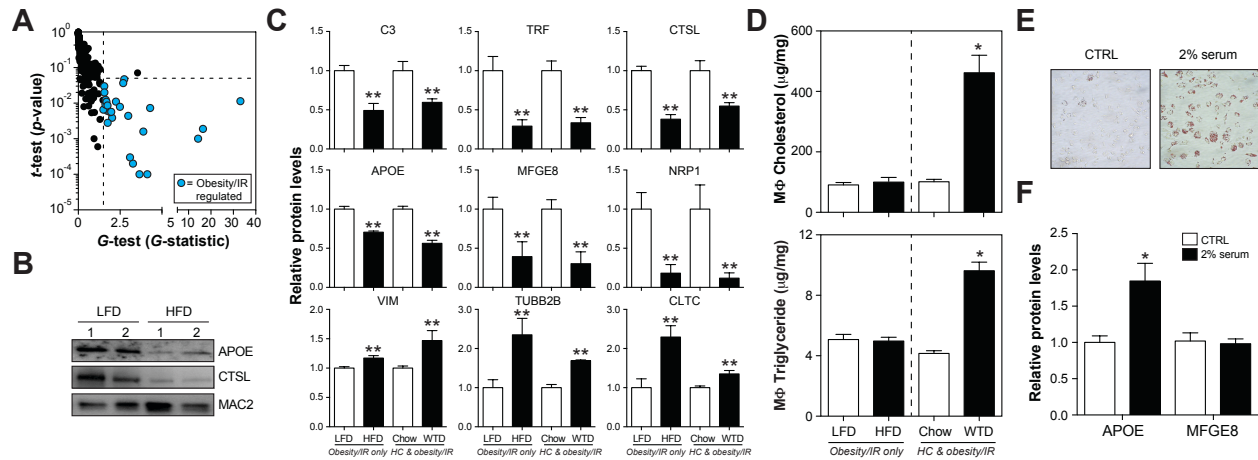

**Fig. S2. Obesity/IR targets the MSRN, a pro-atherogenic macrophage protein network (related to Fig. 1).** For the ‘obesity/IR only’ model, wt C57BL/6 mice were fed a low-fat (LFD) or high-fat diet (HFD) for 9 weeks. For the ‘HC & obesity/IR’ model, *Ldlr*<sup>-/-</sup> mice were fed a chow or western-type diet (WTD) for 12 weeks. Panel A: Proteomics analysis of elicited peritoneal macrophages in the *obesity/IR only* model. Differentially expressed proteins (blue circles) were identified based on the *G*-test ( $G > 1.5$ ) and *t*-test ( $p < 0.05$ ). Panel B: Immunoblotting validation for changes in protein abundance for APOE and CTSL. MAC2 was used as a control. Panel C: Regulation of the 9 MSRN proteins. Panel D: Peritoneal macrophages cholesterol and triglyceride levels. Panels E-F: Peritoneal macrophages were treated with and without 2% serum from WTD-fed *Ldlr*<sup>-/-</sup> mice. Cholesterol loading was confirmed by Oil-red-O staining (Panel E) and media APOE and MFGE8 were quantified (Panel F). Results show that *in vitro* cholesterol loading does not replicate the MSRN protein changes observed in WTD-fed *Ldlr*<sup>-/-</sup> mice. Results are mean  $\pm$  SEM. \*,  $p < 0.05$  (*t*-test). \*\*,  $G > 1.5$  (*G*-test) and  $p < 0.05$  (*t*-test).  $n = 2-5$  mice/group.

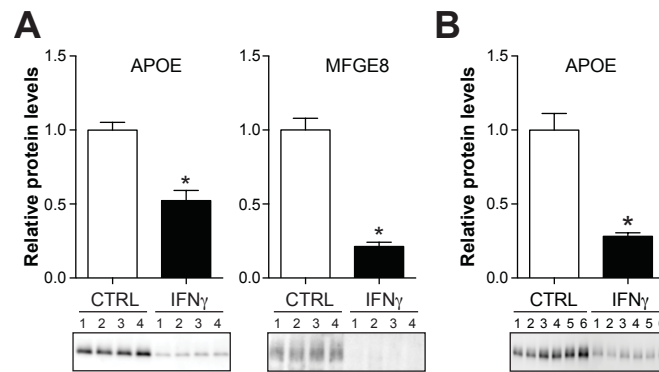

**Fig. S3. IFN $\gamma$  targets MSRN proteins in many types of macrophages (related to Fig. 3).** APOE and/or MFGE8 protein levels in conditioned media collected from murine bone marrow-derived macrophages (*Panel A*) or human monocyte-derived macrophages (*Panel B*) treated with vehicle (CTRL) or IFN $\gamma$  (12 ng/mL) for 24h. Results are mean  $\pm$  SEM. \*,  $p < 0.05$  Student's  $t$ -test. n=4-6 biological replicates/group.

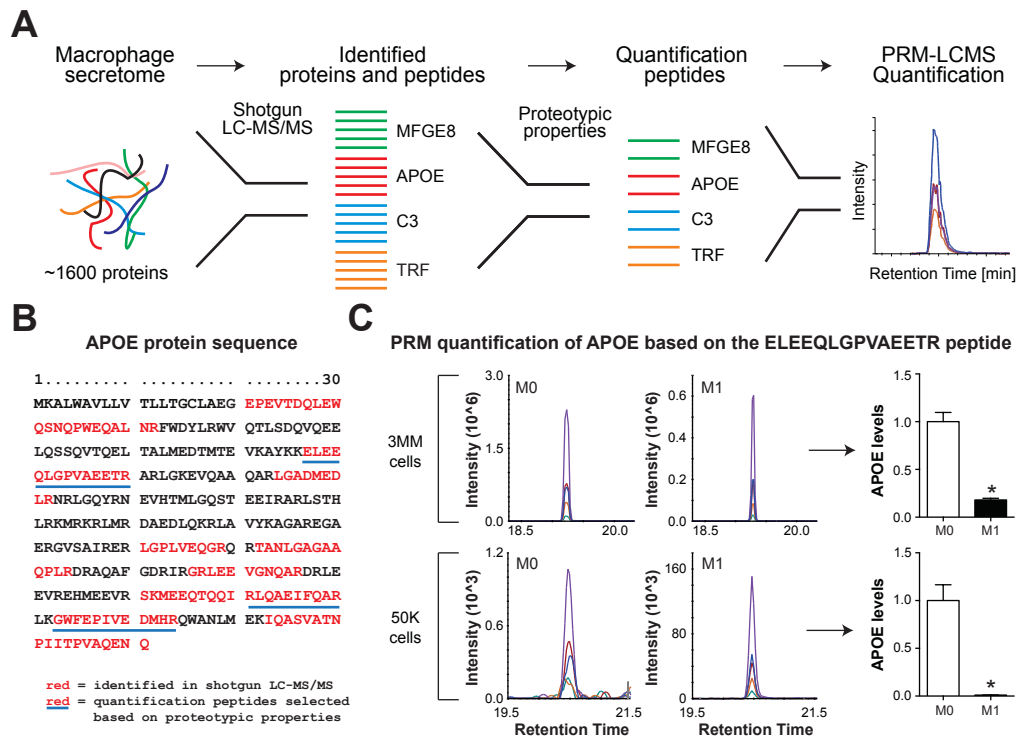

**Fig. S4. A parallel reaction monitoring method for quantifying MSRN proteins in limited numbers of macrophages (related to Fig. 3).** *Panel A:* Development of a targeted proteomics assay for quantification of MSRN proteins. MSRN proteins and identified peptides were selected from shotgun proteomics analysis and further evaluated for proteotypic properties using public resources. Best peptides (up to 5 per protein where available) were selected and further investigated using Parallel Reaction Monitoring LCMS in samples from unstimulated (M0) or classically activated (M1) BMDMs. Two conditioned were used: 3 million macrophages were cultured, proteins in the conditioned media were precipitated, and 0.2  $\mu$ g was injected, or 50,000 macrophages were cultured and conditioned media were analyzed directly. *Panel A:* Workflow diagram. *Panel B:* Protein sequence of APOE indicating peptides selected for PRM quantification. *Panel C:* Quantification of APOE based on the ELEEQLGPVAEETR peptide in 3million or 50,000 M0 and M1 macrophages.

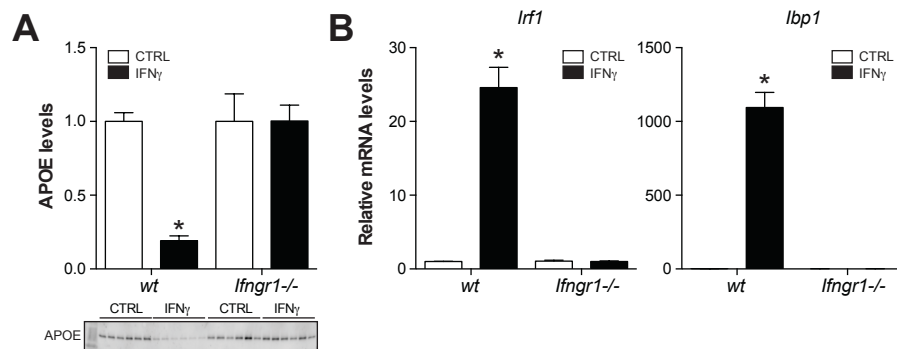

**Fig. S5. IFNGR1 is required for IFN $\gamma$  to target MSR proteins and its target genes *in vitro* (related to Figs. 4-6).** Wild-type (*wt*) and *Ifngr1*<sup>-/-</sup> macrophages were treated with vehicle (CTRL) or 12ng/mL IFN $\gamma$ . Panel A: Media APOE levels. Panel B: mRNA levels of IFN $\gamma$ -target genes. Results are mean  $\pm$  SEM. \*,  $p < 0.05$  Student's *t*-test. n=6 biological replicates/group.

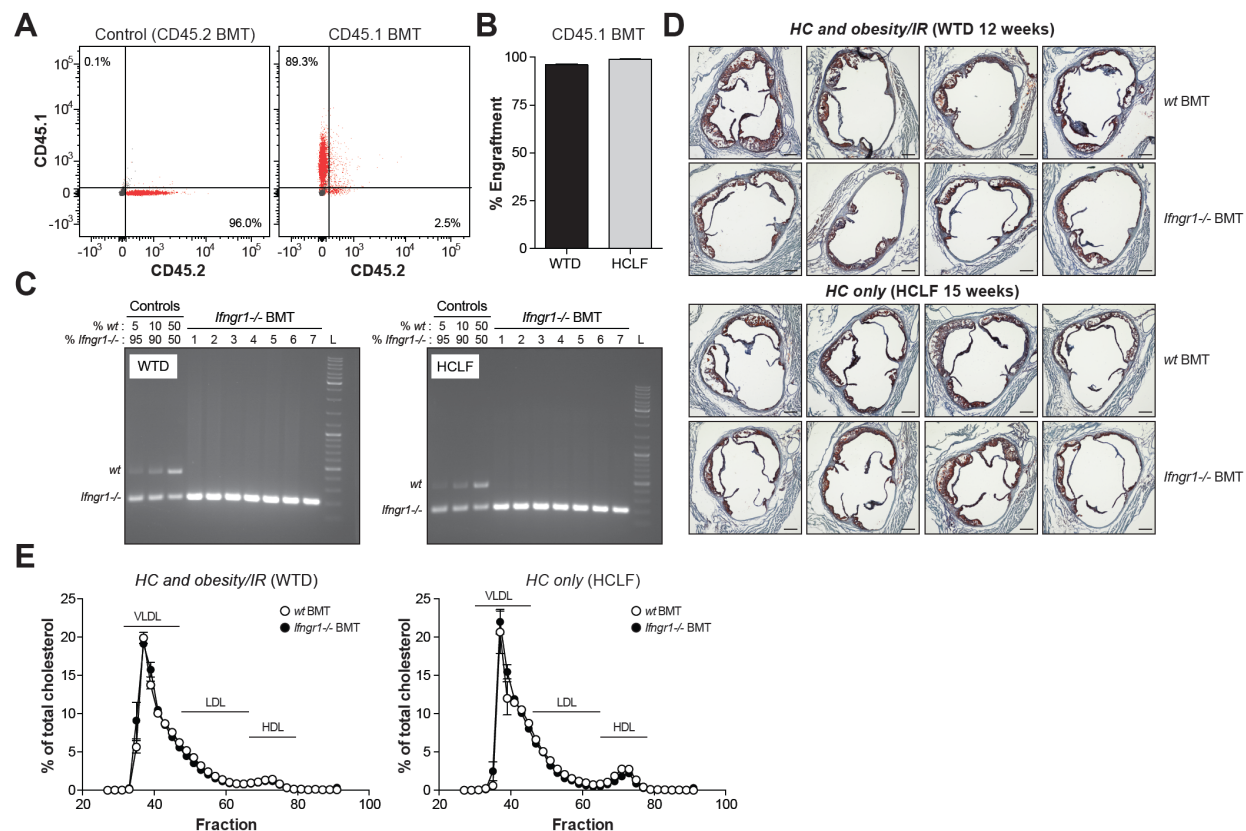

**Fig. S6. Supplementary data for *wt* and *Ifngr1*<sup>-/-</sup> bone marrow transplants into *Ldlr*<sup>-/-</sup> mice (related to Fig. 6).** *Ldlr*<sup>-/-</sup> mice transplanted with *wt* or *Ifngr1*<sup>-/-</sup> bone marrow cells were fed a WTD or HCLF diet for up to 15 weeks. **Panel A-B:** Engraftments for *wt* bone marrow transplants were assessed by flow cytometric analysis of the ratio of CD45.1 (donor) to CD45.2 (recipient) positive bone marrow cells. **Panel C:** Engraftments for *Ifngr1*<sup>-/-</sup> bone marrow transplants were assessed by PCR analysis of the ratio of *Ifngr1*<sup>-/-</sup> (donor) and *wt* (recipient) in comparison to pre-defined mixtures of bone marrow from *wt* and *Ifngr1*<sup>-/-</sup> mice. Seven mice per dietary condition are shown as examples. All engraftments were judged to be >95%. **Panel D:** Cross-sections of the aortic root were stained with Oil-red-O, counterstained with hematoxylin and fast green, and lesion area was quantified. Four representative images are shown per group. Scale = 200  $\mu$ m. **Panel E:** Plasma (100  $\mu$ L) was fractionated by gel filtration using two Superose-6 columns in tandem, and cholesterol levels in each fraction were quantified using the Amplex Red Cholesterol Assay kit (Invitrogen). Results are mean  $\pm$  SEM. n=5-12 mice/group.

| Obesity/IR only Model |        |         |                             |        |                                    |        |
|-----------------------|--------|---------|-----------------------------|--------|------------------------------------|--------|
| Protein annotations   |        |         | wt C57BL/6 mice HFD vs. LFD |        | Ifngr1-/- C57BL/6 mice HFD vs. LFD |        |
| Uniprot               | Entrez | Protein | G-test (HFD : LFD)          | t-test | G-test (HFD : LFD)                 | t-test |
| P01027                | 12266  | C3      | -16.43                      | 0.0019 | 0.57                               | 0.4722 |
| Q92111                | 22041  | TRF     | -4.30                       | 0.0073 | 0.00                               | 0.9792 |
| P06797                | 13039  | CTSL    | -4.13                       | 0.0001 | 3.80                               | 0.0070 |
| P08226                | 11816  | APOE    | -3.66                       | 0.0001 | 0.00                               | 0.9646 |
| P21956                | 17304  | MFGE8   | -2.69                       | 0.0368 | 0.49                               | 0.1593 |
| P97333                | 18186  | NRP1    | -2.02                       | 0.0039 | 0.49                               | 0.0509 |
| P20152                | 22352  | VIM     | 1.50                        | 0.0066 | -0.50                              | 0.0820 |
| B2RSN3                | 73710  | TUBB2B  | 1.56                        | 0.0201 | ND                                 | ND     |
| Q68FD5                | 67300  | CLTC    | 2.49                        | 0.0079 | 1.04                               | 0.0035 |

  

| HC +/- Obesity/IR Model |        |         |                           |        |                            |        |
|-------------------------|--------|---------|---------------------------|--------|----------------------------|--------|
| Protein annotations     |        |         | Ldlr-/- mice WTD vs. Chow |        | Ldlr-/- mice HCLF vs. Chow |        |
| Uniprot                 | Entrez | Protein | G-test (WTD : Chow)       | t-test | G-test (HCLF : Chow)       | t-test |
| P01027                  | 12266  | C3      | -9.80                     | 0.0036 | -0.01                      | 0.8893 |
| Q92111                  | 22041  | TRF     | -2.90                     | 0.0082 | 0.31                       | 0.2999 |
| P06797                  | 13039  | CTSL    | -4.46                     | 0.0458 | 7.54                       | 0.2722 |
| P08226                  | 11816  | APOE    | -12.72                    | 0.0047 | 7.75                       | 0.1559 |
| P21956                  | 17304  | MFGE8   | -3.03                     | 0.0271 | 1.06                       | 0.5212 |
| P97333                  | 18186  | NRP1    | -1.84                     | 0.0013 | 0.85                       | 0.4994 |
| P20152                  | 22352  | VIM     | 3.57                      | 0.0052 | 3.66                       | 0.2052 |
| B2RSN3                  | 73710  | TUBB2B  | 4.06                      | 0.0169 | 0.78                       | 0.4146 |
| Q68FD5                  | 67300  | CLTC    | 2.63                      | 0.0500 | 8.01                       | 0.1054 |

  

| HC +/- Obesity/IR Model (Bone marrow transplantation) |        |         |                                         |        |                                          |        |
|-------------------------------------------------------|--------|---------|-----------------------------------------|--------|------------------------------------------|--------|
| Protein annotations                                   |        |         | Ldlr-/- mice WTD (Ifngr1-/- vs. wt BMT) |        | Ldlr-/- mice HCLF (Ifngr1-/- vs. wt BMT) |        |
| Uniprot                                               | Entrez | Protein | G-test (-/- : wt)                       | t-test | G-test (-/- : wt)                        | t-test |
| P01027                                                | 12266  | C3      | 14.10                                   | 0.0190 | 0.29                                     | 0.6344 |
| Q92111                                                | 22041  | TRF     | 0.19                                    | 0.1629 | 0.00                                     | 0.9837 |
| P06797                                                | 13039  | CTSL    | 0.50                                    | 0.1482 | -0.25                                    | 0.1226 |
| P08226                                                | 11816  | APOE    | 7.37                                    | 0.0448 | 0.03                                     | 0.8749 |
| P21956                                                | 17304  | MFGE8   | 3.07                                    | 0.0073 | 0.52                                     | 0.2275 |
| P97333                                                | 18186  | NRP1    | 2.90                                    | 0.0030 | 0.38                                     | 0.1316 |
| P20152                                                | 22352  | VIM     | 0.00                                    | 0.9569 | 0.04                                     | 0.6143 |
| B2RSN3                                                | 73710  | TUBB2B  | -0.52                                   | 0.0317 | -0.24                                    | 0.1028 |
| Q68FD5                                                | 67300  | CLTC    | -1.50                                   | 0.0240 | 0.02                                     | 0.6031 |

**Table S1. Shotgun proteomics analysis of elicited peritoneal macrophages (related to Figs. 1, 4, 6).** Proteomics analysis of the conditioned media collected from elicited peritoneal macrophages isolated from *wt* or *Ifngr1-/-* C57BL/6 mice fed the LFD or HFD, from *Ldlr-/-* mice fed the chow, WTD, or HCLF diet, and from *Ldlr-/-* mice transplanted with *wt* or *Ifngr1-/-* bone marrow fed the WTD or HCLF diet. Proteomics data were analyzed by the G-test (G-statistic) and t-test (p-value). Differentially abundant proteins are shaded; red = up-regulated in 1<sup>st</sup> sample relative to the 2<sup>nd</sup>, green = down-regulated in the 1<sup>st</sup> sample relative to the 2<sup>nd</sup>. ND = not detected. n=3-5 mice/group.

| <b>Gene</b>   | <b>Primer</b> | <b>Primer Sequence</b>     |
|---------------|---------------|----------------------------|
| <i>Ifngr1</i> | Wild type     | TCGCTTTCCAGCTGA            |
|               | Deficient     | CTCGTGCTTTACGGTATCGC       |
|               | Common        | CCACCTCAGCACTGTCTTCA       |
| <i>Srebp2</i> | Forward       | GTTGACCACGCTGAAGACAGA      |
|               | Reverse       | CACCAGGGTTGGCACTTGAA       |
| <i>Abca1</i>  | Forward       | GCTTGTTGGCCTCAGTTAAGG      |
|               | Reverse       | GTAGCTCAGGCGTACAGAGAT      |
| <i>Sra1</i>   | Forward       | TTCAGTGGATGCAATCTCCAAG     |
|               | Reverse       | CTGGACTTCTGCTGATACTTTG     |
| <i>Cd36</i>   | Forward       | ATGGGCTGTGATCGGAAC TG      |
|               | Reverse       | GTCTTCCCAATAAGCATGTCTCC    |
| <i>Abcg1</i>  | Forward       | GTGGATGAGGTTGAGACAGACC     |
|               | Reverse       | CCTCGGGTACAGAGTAGGAAAG     |
| <i>Lxra</i>   | Forward       | ACAGAGCTTCGTCCACAAAAG      |
|               | Reverse       | GCGTGCTCCCTTGATGACA        |
| <i>Acta1</i>  | Forward       | CCCAGACATCAGGGAGTAATGG     |
|               | Reverse       | TCTATCGGATACTTCAGCGTCA     |
| <i>Cdh5</i>   | Forward       | CCACTGCTTTGGGAGCCTT        |
|               | Reverse       | GGCAGGTAGCATGTTGGGG        |
| <i>Cd11b</i>  | Forward       | CCATGACCTTCCAAGAGAATGC     |
|               | Reverse       | ACCGGCTTGTGCTGTAGTC        |
| <i>Irf1</i>   | Forward       | GCTGGAGTTATGTCCCTTTCCATATC |
|               | Reverse       | GGACTCAGCAGCTCTACCCTACCT   |
| <i>Irf8</i>   | Forward       | GCTGGTTCAGCTTTGTCTCC       |
|               | Reverse       | GATCGAACAGATCGACAGCA       |
| <i>Ibp1</i>   | Forward       | GTGTGGTAGAAGCCCACTATTGC    |
|               | Reverse       | CCACATGAAAGGCCCACTGTGC     |

**Table S2. Primer Sequences for PCR (Related to Experimental Procedures).**
